# Supplementary material for: A novel photoanode with high flexibility for fiber-shaped dye sensitized solar cells
Source: Royal Society of Chemistry journal article supplement (doi:10.1039/c5ta10488b), 2016-01-01
Supplement: c5ta10488b1.pdf [file c5ta10488b1.pdf]

## Supporting Information

### **A novel photoanode with high flexibility for fiber-shaped dye sensitized solar cells**

Guicheng Liu <sup>1,2</sup>, Xue Gao <sup>3</sup>, Hui Wang <sup>1</sup>, A-Young Kim <sup>2,4</sup>, Zhenxuan Zhao <sup>1</sup>,

Joong Kee Lee <sup>2</sup>, Dechun Zou <sup>\*1,3</sup>

<sup>1</sup> *Beijing Institute of Nanoenergy and Nanosystems, Chinese Academy of Sciences, 30 Xueyuan Road, Haidian District, Beijing 100083, P.R.China*

<sup>2</sup> *Center for Energy Convergence Research, Green City Research Institute, Korea Institute of Science and Technology (KIST), Hwarangno 14 gil 5, Seongbuk-gu, Seoul 02792, Republic of Korea*

<sup>3</sup> *Beijing National Laboratory for Molecular Sciences, Key Laboratory of Polymer Chemistry and Physics of Ministry of Education, College of Chemistry and Molecular Engineering, Peking University, Beijing 100871, P.R.China*

<sup>4</sup> *Department of Material Science and Engineering, Korea University, Anam dong 5 ga, Seongbuk-gu, Seoul 02841, Republic of Korea*

\* Corresponding author: Prof. Dr. Zou,

Tel/ Fax: +86 010 8285 4789, E-mail: dczou@binn.cas.cn, dczou@pku.edu.cn

DC regulated power supply

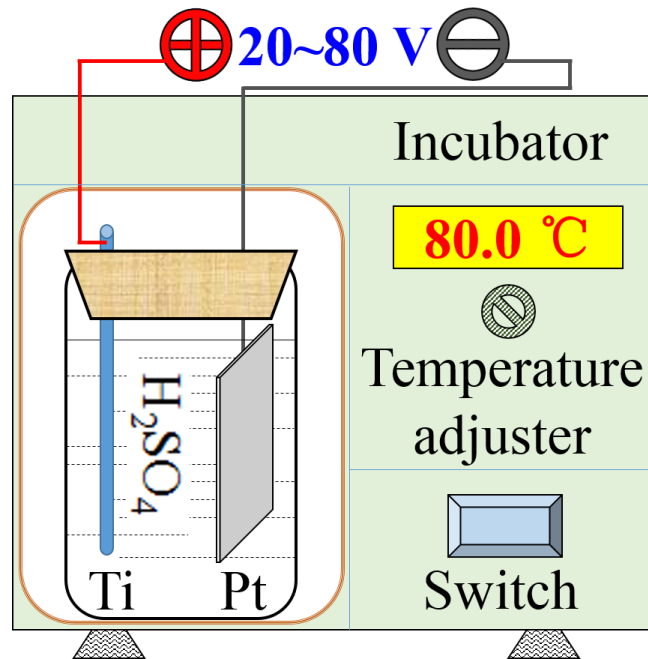

**Fig. S1** Schematic of the preparation process and reactor of Ti/TiO<sub>2</sub> micron-cone array.

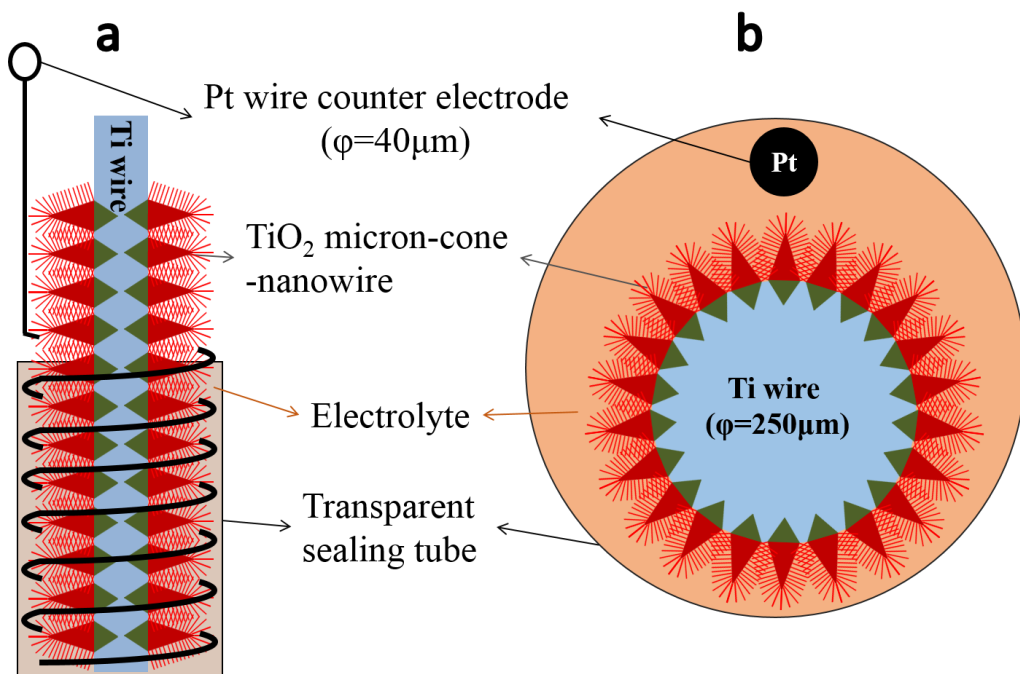

**Fig. S2** Sketch map of the novel FDSSC based on Ti/TiO<sub>2</sub> micron-cone-nanowire array:

a) side and b) cross section.

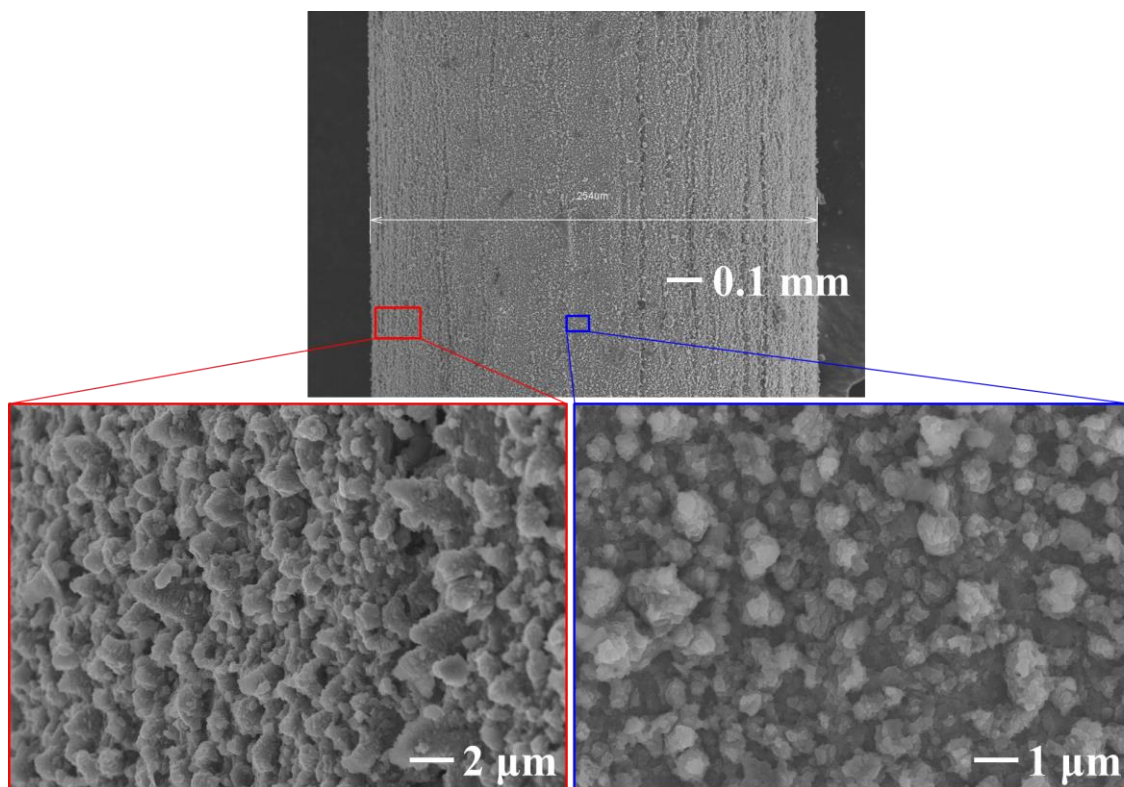

**Fig. S3** SEM images of Ti/TiO<sub>2</sub> micron-cone array prepared at 20V, 80°C and 10h.

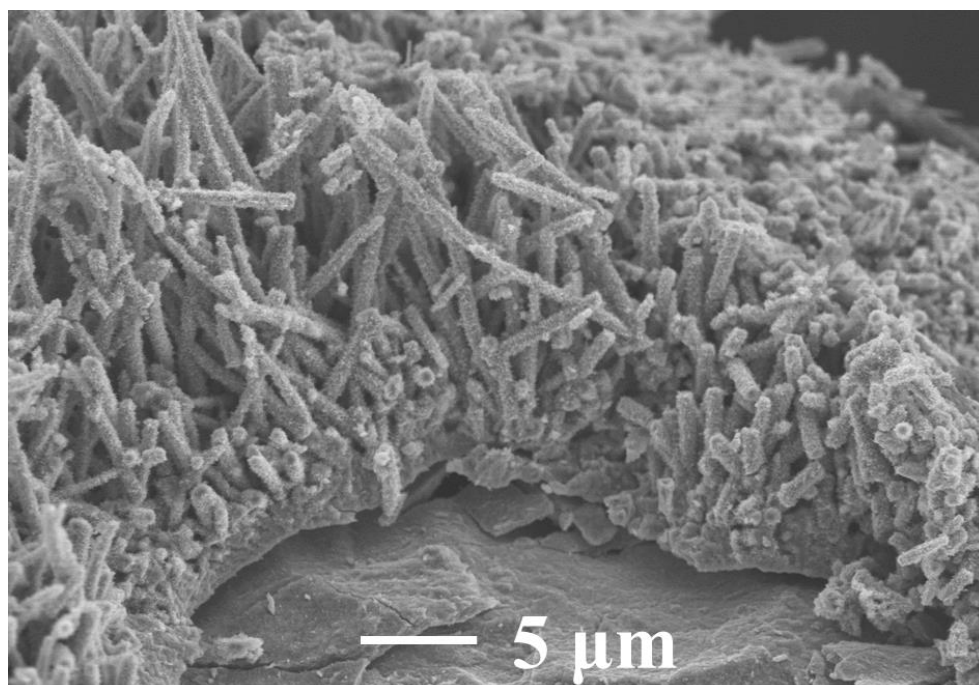

**Fig. S4** Section SEM of Ti/TiO<sub>2</sub> nanowire array.

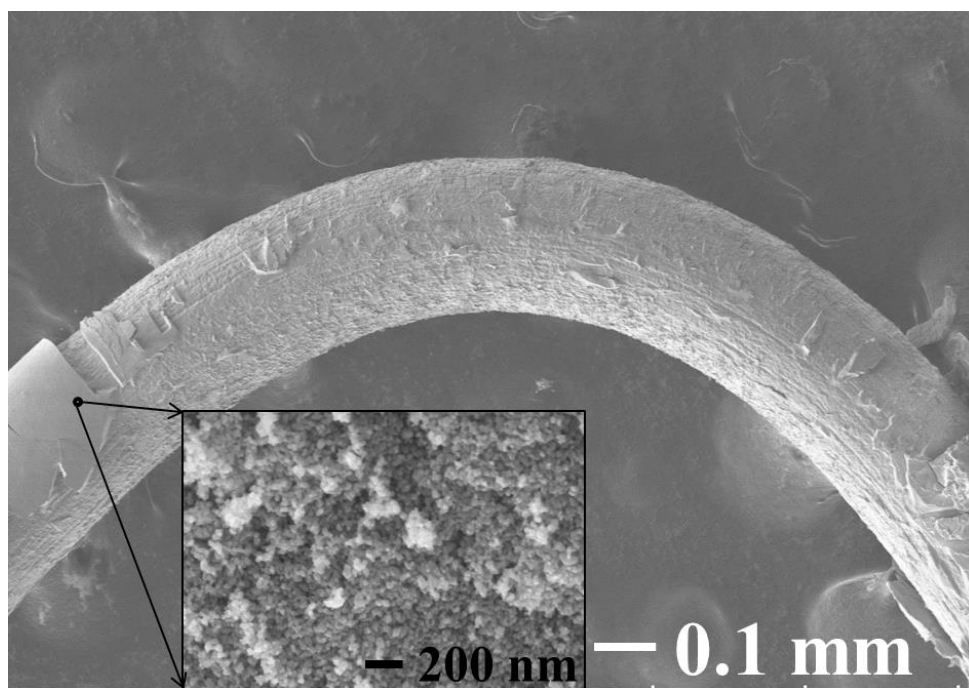

**Fig. S5** SEM images of the bended Ti/TiO<sub>2</sub> nanocrystalline layer.

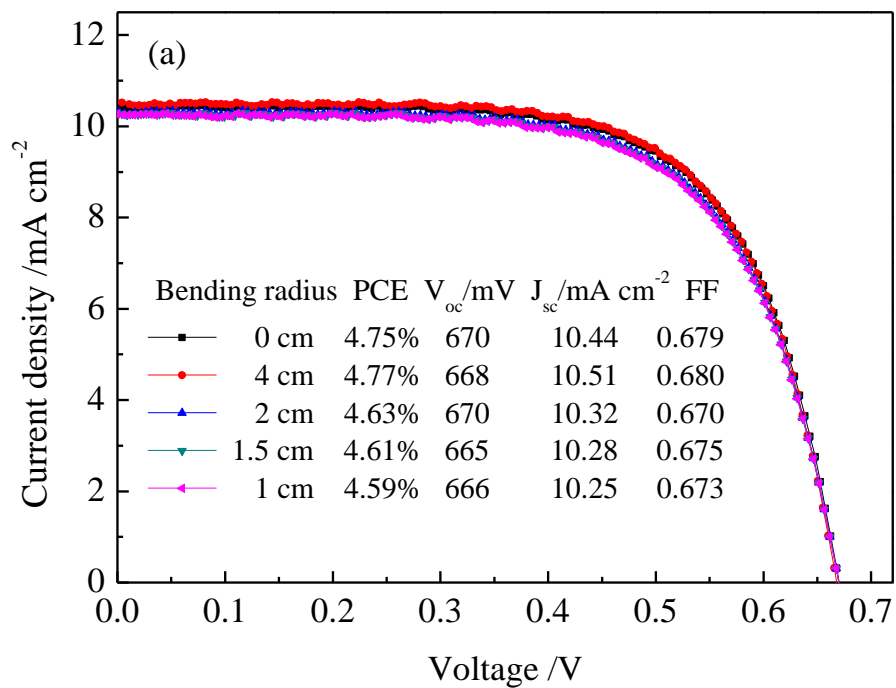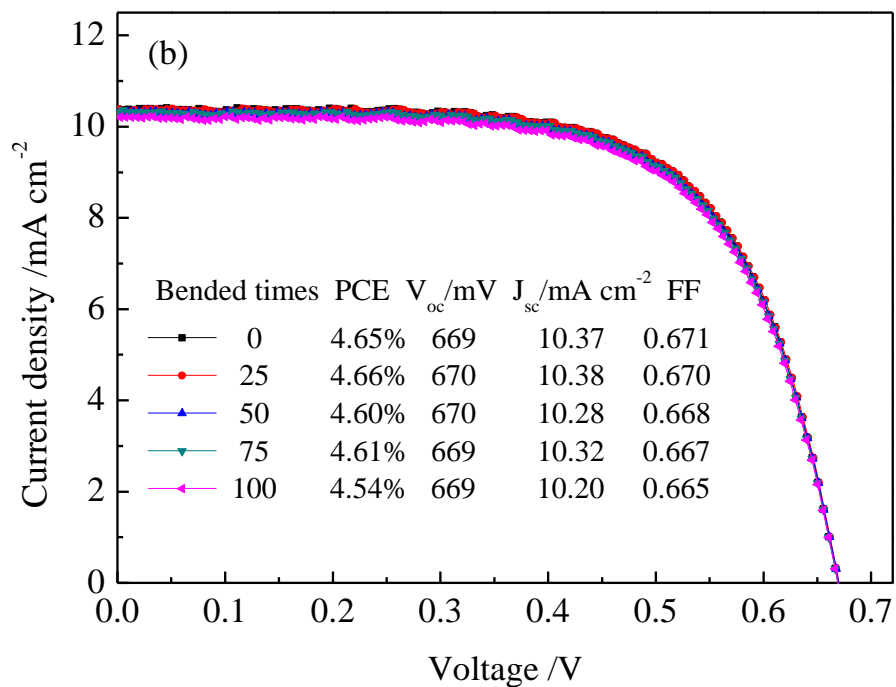

**Fig. S6** Current-voltage curves of the FDSSC with different bending degrees and times.
